# Supplementary material
Source: HighWire-hosted journal article supplement (https://www.jneurosci.org/content/37/50/12094)
Supplement: inline-supplementary-material-4 [file inline-supplementary-material-4.xlsx]

## Sheet: Table 1
Table 1	Bdnf			Fgf7			Fgf9			Fgf10			Fgf22			Fgfr1b			Fgfr1c			Fgfr2b			Fgfr2c				Fgfr3b			Fgfr3c
	Ctrl	KA		Ctrl	KA		Ctrl	KA		Ctrl	KA		Ctrl	KA		Ctrl	KA		Ctrl	KA		Ctrl	KA		Ctrl	KA			Ctrl	KA		Ctrl	KA
	1.1111	2.8031		0.8033	1.4181		0.9774	1.7375		0.879	1.3416		0.819	0.9215		0.9886	0.6366		0.8139	0.9679		0.7066	0.648		0.7906	2.7721			0.9828	1.2746		1.1364	1.1724
	0.7615	4.1468		1.0417	1.0098		0.9706	1.1111		0.952	1.4035		0.9343	1.2329		1.12	1.1317		0.8111	1.002		1.0417	1.0345		0.8621	2.5955			1.1408	1.1647		1.1286	0.9231
	1.0512	2.1317		0.858	0.8089		0.9808	1.1826		1.3186	1.1165		0.974	0.974		1.1046	1.4325		1.0889	1.0814		1.2388	0.6945		1.1103	1.2066			0.9493	1.2142		0.8553	1.0751
	1.3632	3.2199		1.5199	0.9454		1.0154	1.4763		0.8821	1.3651		1.2243	1.6268		0.8787	0.6591		1.304	1.2124		1.3186	1.2693		1.1027	1.9265			0.8351	1.2968		0.9523	1.113
	0.8247	1.7925		0.9164	1.389		1.0585	1.195		1.0274	1.351		1.0958	0.7966		0.9304	1.3136		1.0518	1.9291		0.8316	0.9292		1.1983	2.3801			1.1251	1.6529		0.9573	0.8978
	Table Analyzed	BDNF		Table Analyzed	FGF7		Table Analyzed	FGF9		Table Analyzed	FGF10		Table Analyzed	FGF22		Table Analyzed	FGFR1b		Table Analyzed	FGFR1c		Table Analyzed	FGFR2b		Table Analyzed	FGFR2c			Table Analyzed	FGFR3b		Table Analyzed	FGFR3c
	Column B	KA		Column B	KA		Column B	KA		Column B	KA		Column B	KA		Column B	KA		Column B	KA		Column B	KA		Column B	KA			Column B	KA		Column B	KA
	vs.	vs.		vs.	vs.		vs.	vs.		vs.	vs.		vs.	vs.		vs.	vs.		vs.	vs.		vs.	vs.		vs.	vs.			vs.	vs.		vs.	vs.
	Column A	Ctrl		Column A	Ctrl		Column A	Ctrl		Column A	Ctrl		Column A	Ctrl		Column A	Ctrl		Column A	Ctrl		Column A	Ctrl		Column A	Ctrl			Column A	Ctrl		Column A	Ctrl
	Unpaired t test			Unpaired t test			Unpaired t test			Unpaired t test			Unpaired t test			Unpaired t test			Unpaired t test			Unpaired t test			Unpaired t test				Unpaired t test			Unpaired t test
	P value	0.0031		P value	0.6407		P value	0.0208		P value	0.0133		P value	0.5531		P value	0.8646		P value	0.295		P value	0.5099		P value	0.004			P value	0.0162		P value	0.7034
	P value summary	**		P value summary	ns		P value summary	*		P value summary	*		P value summary	ns		P value summary	ns		P value summary	ns		P value summary	ns		P value summary	**			P value summary	*		P value summary	ns
	Significantly different? (P < 0.05)	Yes		Significantly different? (P < 0.05)	No		Significantly different? (P < 0.05)	Yes		Significantly different? (P < 0.05)	Yes		Significantly different? (P < 0.05)	No		Significantly different? (P < 0.05)	No		Significantly different? (P < 0.05)	No		Significantly different? (P < 0.05)	No		Significantly different? (P < 0.05)	Yes			Significantly different? (P < 0.05)	Yes		Significantly different? (P < 0.05)	No
	One- or two-tailed P value?	Two-tailed		One- or two-tailed P value?	Two-tailed		One- or two-tailed P value?	Two-tailed		One- or two-tailed P value?	Two-tailed		One- or two-tailed P value?	Two-tailed		One- or two-tailed P value?	Two-tailed		One- or two-tailed P value?	Two-tailed		One- or two-tailed P value?	Two-tailed		One- or two-tailed P value?	Two-tailed			One- or two-tailed P value?	Two-tailed		One- or two-tailed P value?	Two-tailed
	t, df	t=4.187 df=8		t, df	t=0.4850 df=8		t, df	t=2.872 df=8		t, df	t=3.165 df=8		t, df	t=0.6190 df=8		t, df	t=0.1761 df=8		t, df	t=1.120 df=8		t, df	t=0.6897 df=8		t, df	t=3.991 df=8			t, df	t=3.035 df=8		t, df	t=0.3946 df=8
	How big is the difference?			How big is the difference?			How big is the difference?			How big is the difference?			How big is the difference?			How big is the difference?			How big is the difference?			How big is the difference?			How big is the difference?				How big is the difference?			How big is the difference?
	Mean ± SEM of column A	1.022 ± 0.1077, n=5		Mean ± SEM of column A	1.028 ± 0.1292, n=5		Mean ± SEM of column A	1.001 ± 0.01643, n=5		Mean ± SEM of column A	1.012 ± 0.08136, n=5		Mean ± SEM of column A	1.009 ± 0.06957, n=5		Mean ± SEM of column A	1.004 ± 0.04740, n=5		Mean ± SEM of column A	1.014 ± 0.09283, n=5		Mean ± SEM of column A	1.027 ± 0.1164, n=5		Mean ± SEM of column A	1.013 ± 0.07877, n=5			Mean ± SEM of column A	1.007 ± 0.05715, n=5		Mean ± SEM of column A	1.006 ± 0.05477, n=5
	Mean ± SEM of column B	2.819 ± 0.4153, n=5		Mean ± SEM of column B	1.114 ± 0.1226, n=5		Mean ± SEM of column B	1.341 ± 0.1172, n=5		Mean ± SEM of column B	1.316 ± 0.05087, n=5		Mean ± SEM of column B	1.110 ± 0.1474, n=5		Mean ± SEM of column B	1.035 ± 0.1651, n=5		Mean ± SEM of column B	1.239 ± 0.1777, n=5		Mean ± SEM of column B	0.9151 ± 0.1140, n=5		Mean ± SEM of column B	2.176 ± 0.2806, n=5			Mean ± SEM of column B	1.321 ± 0.08624, n=5		Mean ± SEM of column B	1.036 ± 0.05381, n=5
	Difference between means	1.796 ± 0.4291		Difference between means	0.08638 ± 0.1781		Difference between means	0.3400 ± 0.1184		Difference between means	0.3037 ± 0.09596		Difference between means	0.1009 ± 0.1630		Difference between means	0.03024 ± 0.1717		Difference between means	0.2246 ± 0.2005		Difference between means	-0.1124 ± 0.1629		Difference between means	1.163 ± 0.2915			Difference between means	0.3140 ± 0.1035		Difference between means	0.0303 ± 0.07678
	95% confidence interval	0.8070 to 2.786		95% confidence interval	-0.3243 to 0.4971		95% confidence interval	0.06702 to 0.6129		95% confidence interval	0.08245 to 0.5250		95% confidence interval	-0.2749 to 0.4767		95% confidence interval	-0.3658 to 0.4263		95% confidence interval	-0.2377 to 0.6869		95% confidence interval	-0.4881 to 0.2633		95% confidence interval	0.4912 to 1.835			95% confidence interval	0.07546 to 0.5526		95% confidence interval	-0.1468 to 0.2074
	R squared	0.6866		R squared	0.02856		R squared	0.5077		R squared	0.556		R squared	0.0457		R squared	0.00386		R squared	0.1356		R squared	0.05612		R squared	0.6657			R squared	0.5353		R squared	0.01909
	F test to compare variances			F test to compare variances			F test to compare variances			F test to compare variances			F test to compare variances			F test to compare variances			F test to compare variances			F test to compare variances			F test to compare variances				F test to compare variances			F test to compare variances
	F,DFn, Dfd	14.87, 4, 4		F,DFn, Dfd	1.112, 4, 4		F,DFn, Dfd	50.87, 4, 4		F,DFn, Dfd	2.559, 4, 4		F,DFn, Dfd	4.488, 4, 4		F,DFn, Dfd	12.13, 4, 4		F,DFn, Dfd	3.664, 4, 4		F,DFn, Dfd	1.042, 4, 4		F,DFn, Dfd	12.69, 4, 4			F,DFn, Dfd	2.277, 4, 4		F,DFn, Dfd	1.036, 4, 4
	P value	0.0228		P value	0.9208		P value	0.0022		P value	0.385		P value	0.175		P value	0.033		P value	0.2364		P value	0.9689		P value	0.0304			P value	0.445		P value	0.9734
	P value summary	*		P value summary	ns		P value summary	**		P value summary	ns		P value summary	ns		P value summary	*		P value summary	ns		P value summary	ns		P value summary	*			P value summary	ns		P value summary	ns
	Significantly different? (P < 0.05)	Yes		Significantly different? (P < 0.05)	No		Significantly different? (P < 0.05)	Yes		Significantly different? (P < 0.05)	No		Significantly different? (P < 0.05)	No		Significantly different? (P < 0.05)	Yes		Significantly different? (P < 0.05)	No		Significantly different? (P < 0.05)	No		Significantly different? (P < 0.05)	Yes			Significantly different? (P < 0.05)	No		Significantly different? (P < 0.05)	No
